# Supplementary material for: Prognostic value of metabolic syndrome in patients with heart failure and malnutrition
Source: Springer Nature journal article supplement (doi:10.1186/s12872-024-03767-5), 2024-03-02

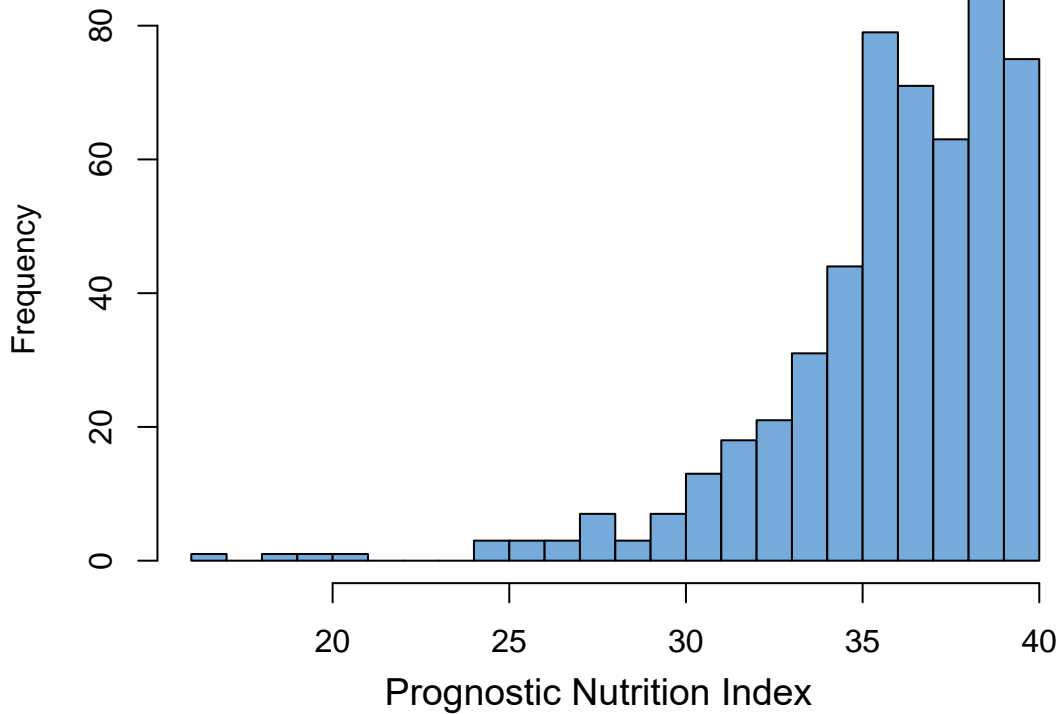

Supplement: MOESM1 [file 26810554]
